# Supplementary material for: Revealing the relation between spatial patterns of rainfall return levels and landslide density
Source: Copernicus journal article supplement (doi:10.5194/esurf-11-461-2023), 2023-05-15
Supplement: Supplementary file 1 [file esurf-11-461-2023-supplement.pdf]

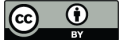

*Supplement of*

## **Revealing the relation between spatial patterns of rainfall return levels and landslide density**

**Slim Mtibaa and Haruka Tsunetaka**

*Correspondence to:* Slim Mtibaa ([mtibaaslim@ffpri.affrc.go.jp](mailto:mtibaaslim@ffpri.affrc.go.jp))

The copyright of individual parts of the supplement might differ from the article licence.

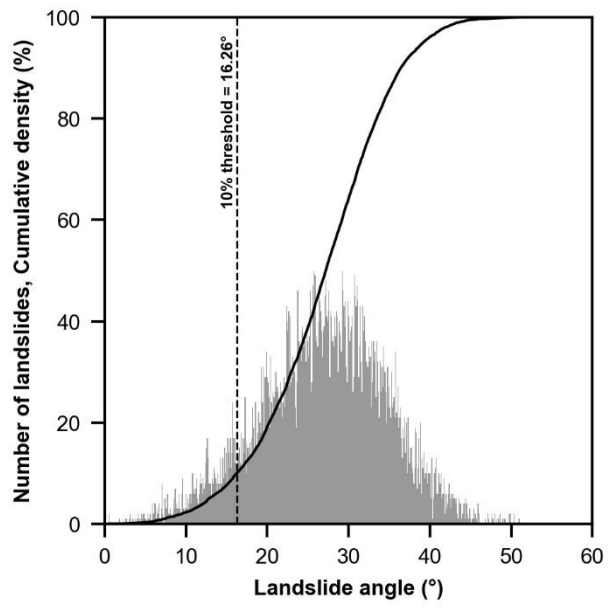

**Figure S1: Non-cumulative (gray histogram) and cumulative (black line) frequency distribution of landslide angle**

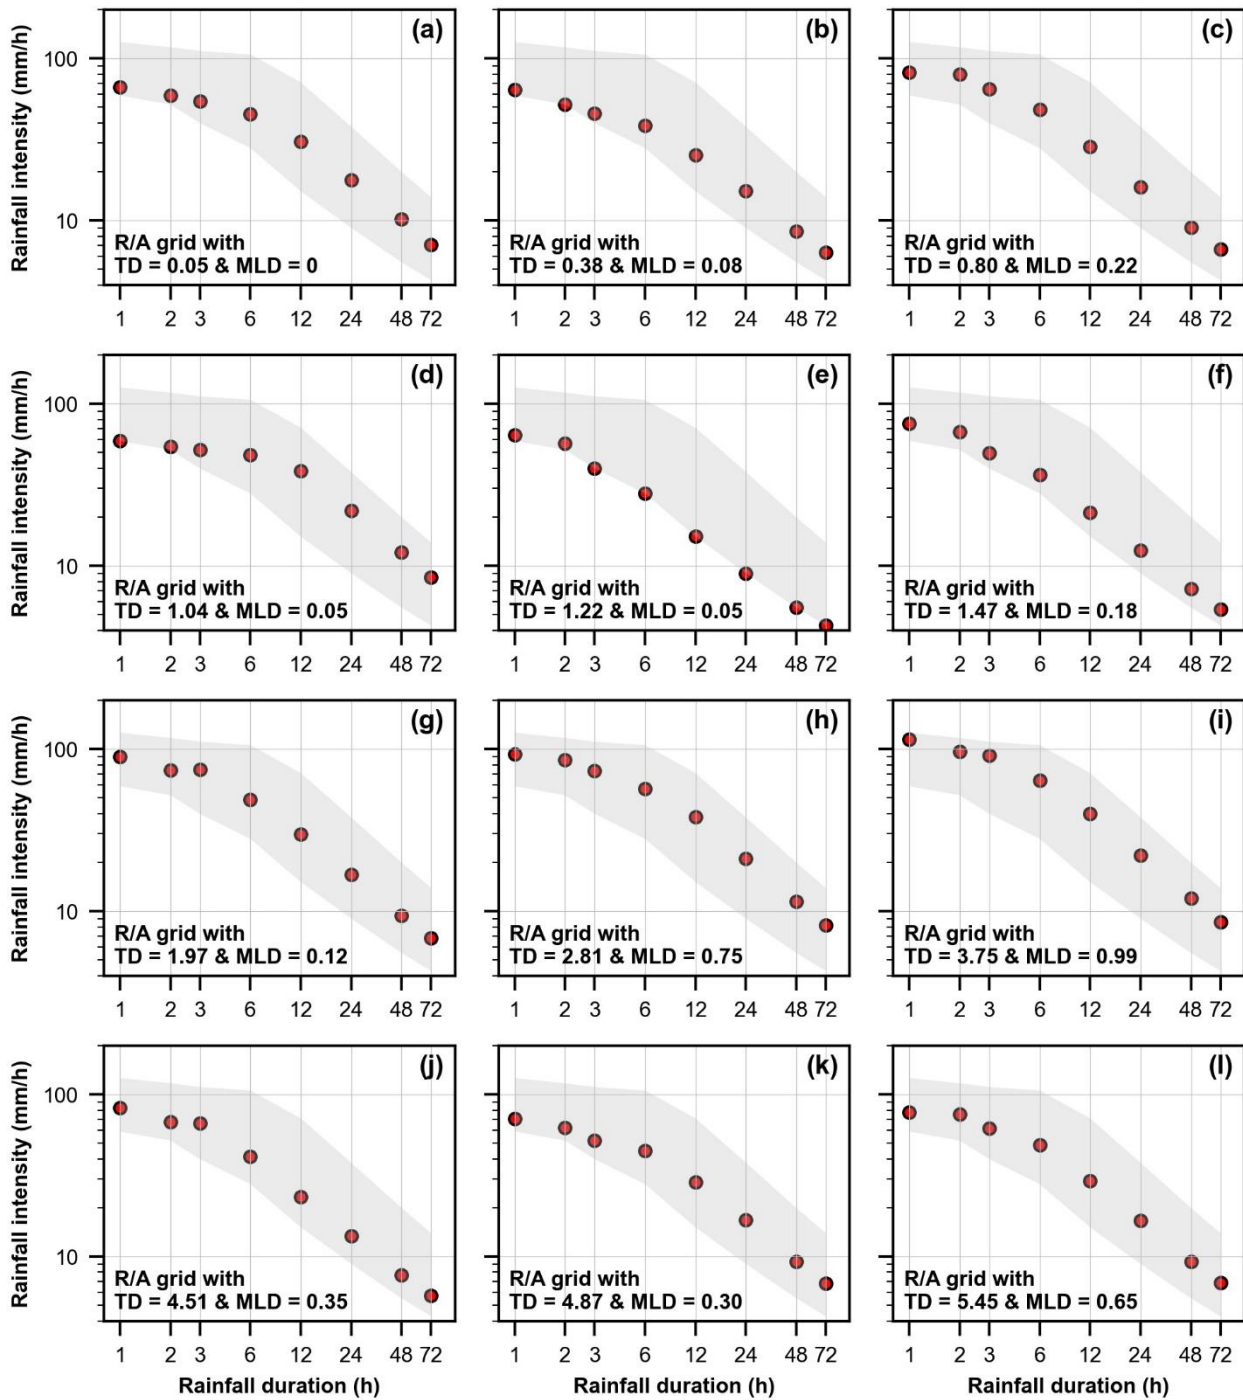

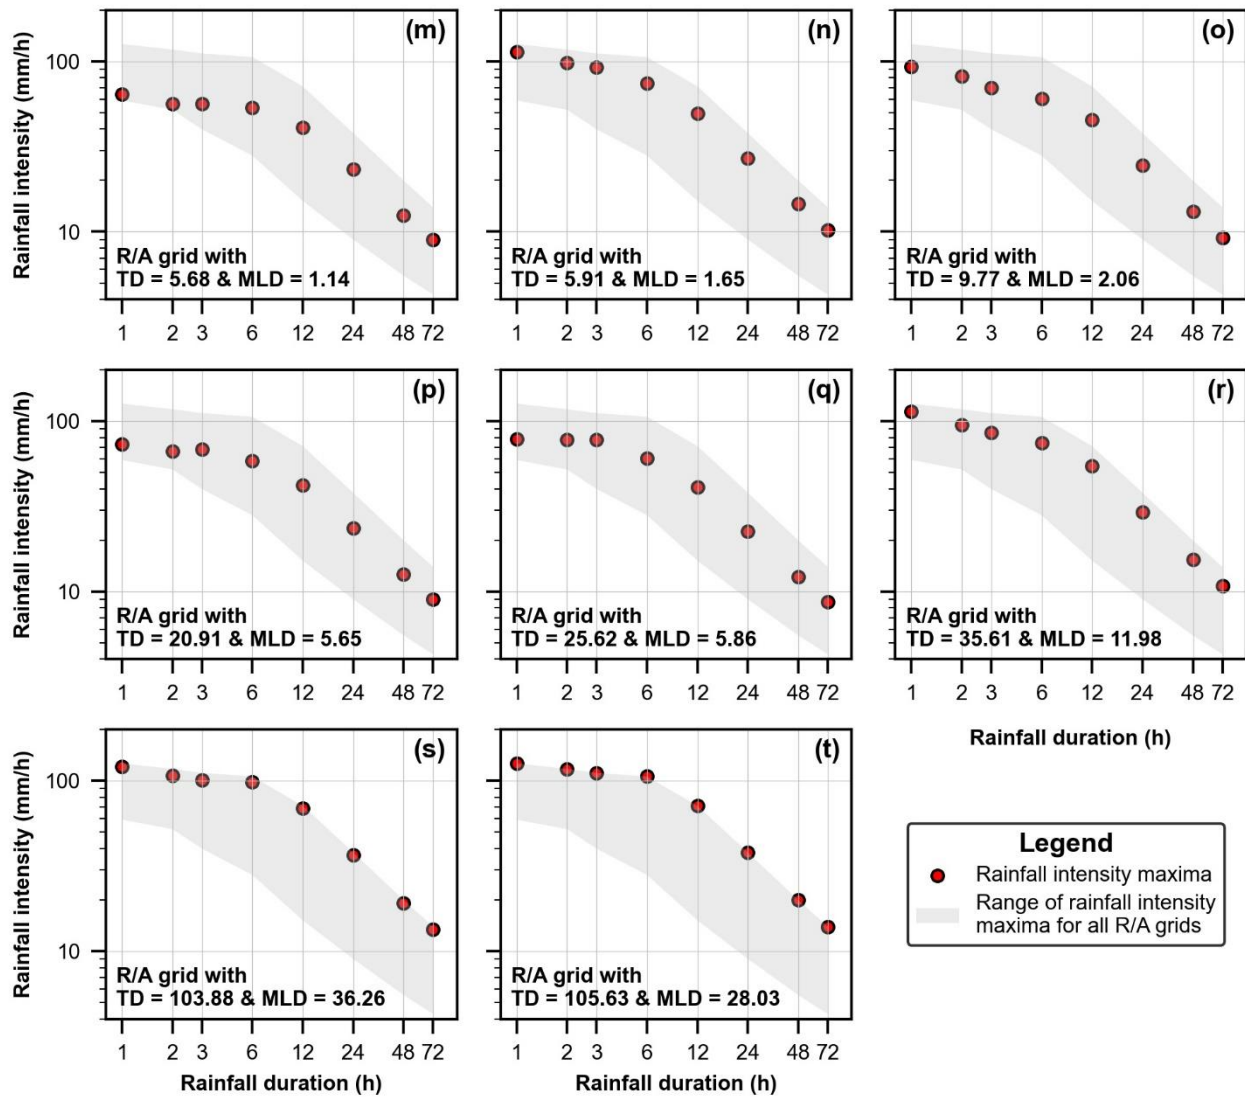

Figure S2: Rainfall intensity maxima for multiple timespans (1–72 h) within the  $P_{std}$  for the different R/A grid cells (excluding three R/A grid cells where landslide occurrence was deemed to be affected by anthropogenic activities).

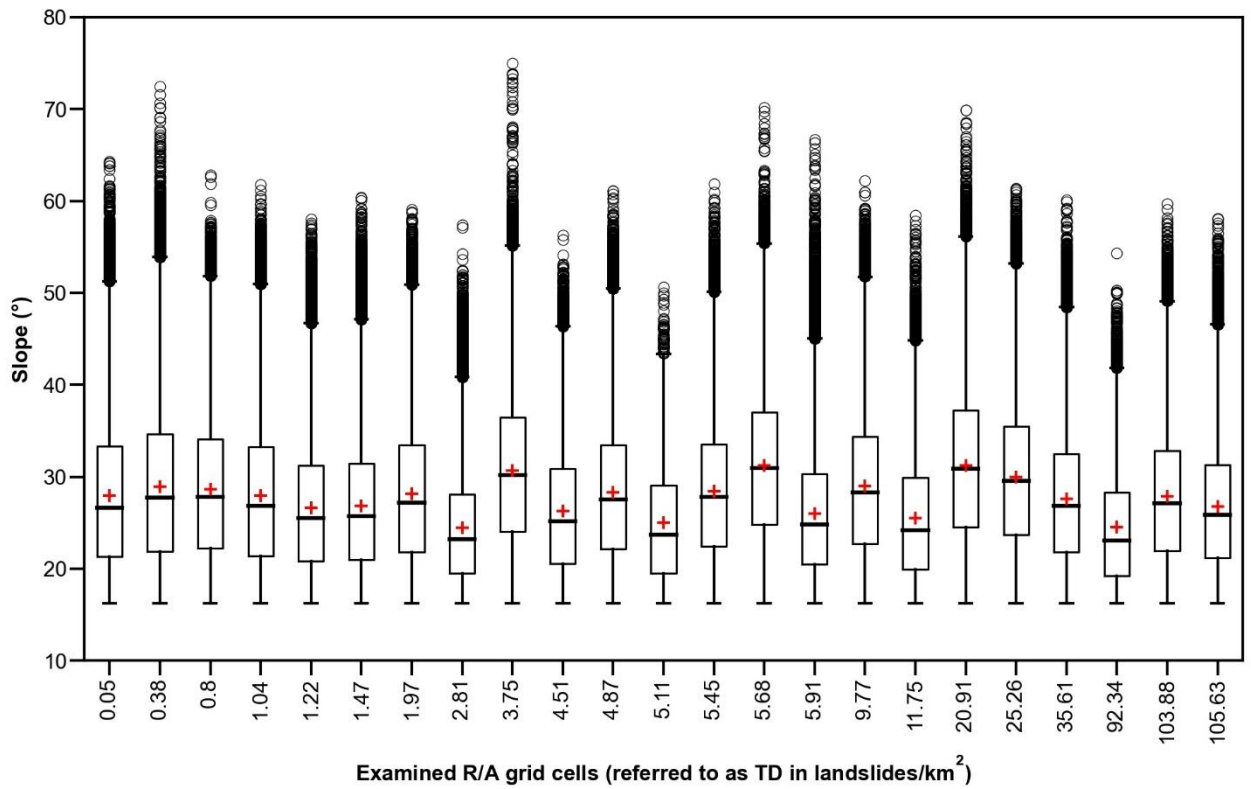

10

**Figure S3: Distribution of local slopes within  $A_{threshold}$  of the R/A grid cells. Note that the distributions are shown as box-and-whisker plots. The box delimitates the 25<sup>th</sup> and 75<sup>th</sup> percentiles. The black line indicates the median. The red cross '+' displays the mean. The circles 'o' designate the outliers.**

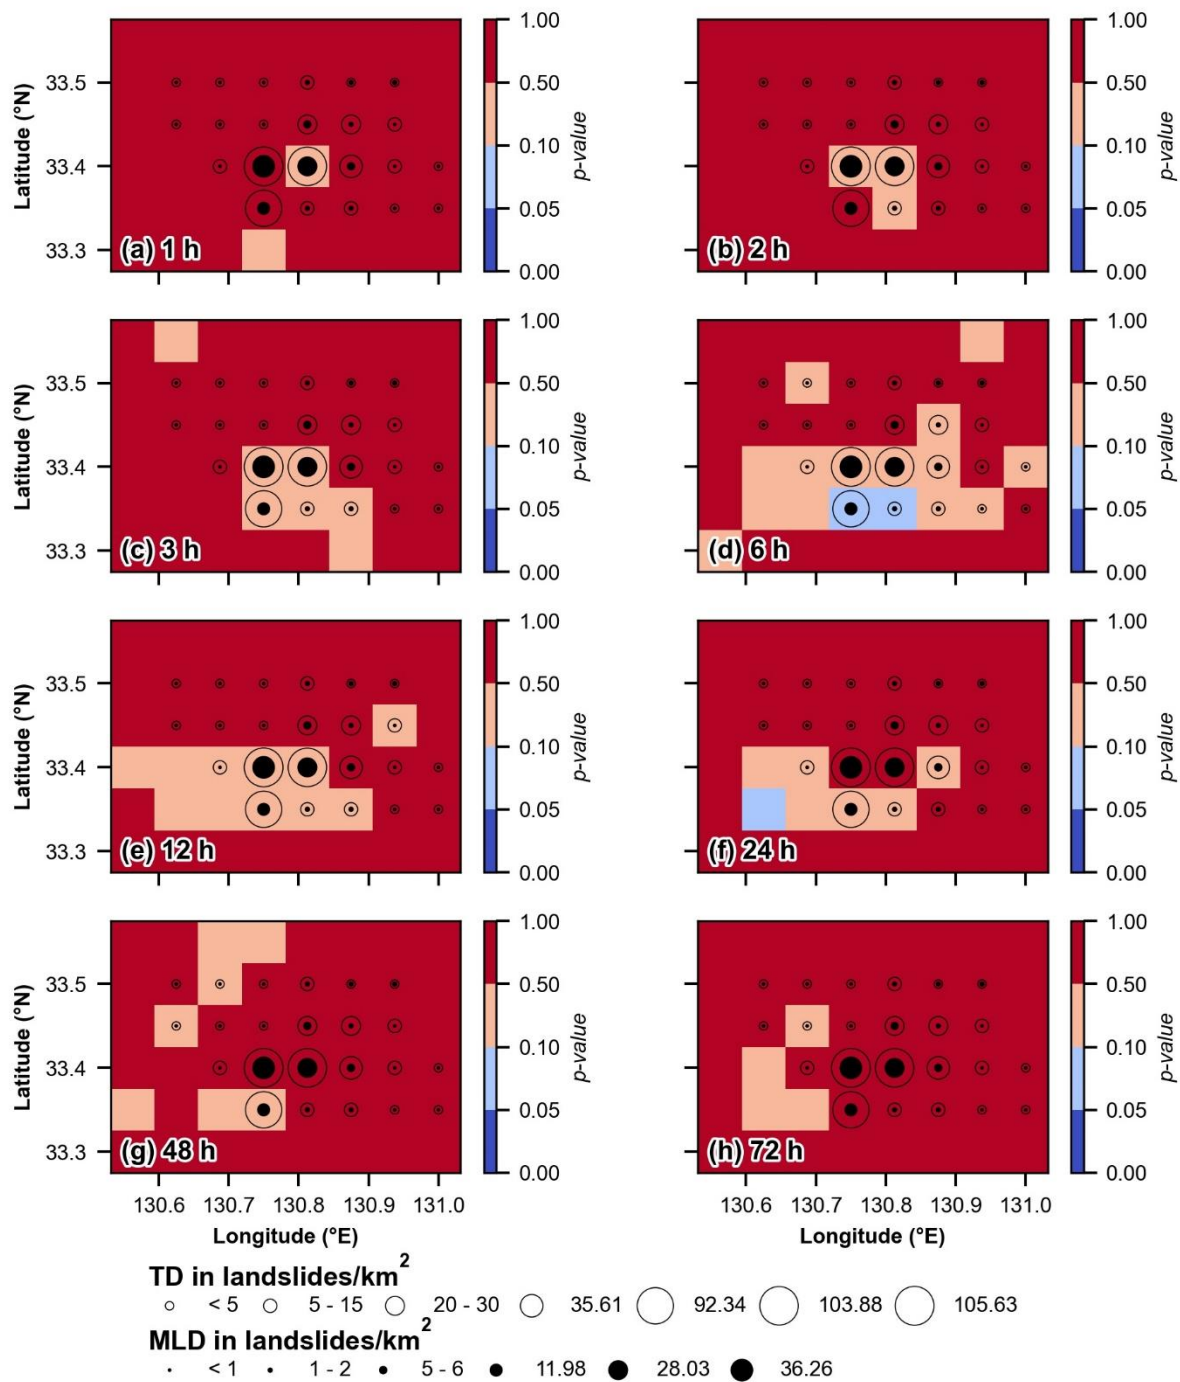

15

Figure S4: Spatial distribution maps of *p-values* resulted from the Kolmogorov-Smirnov test

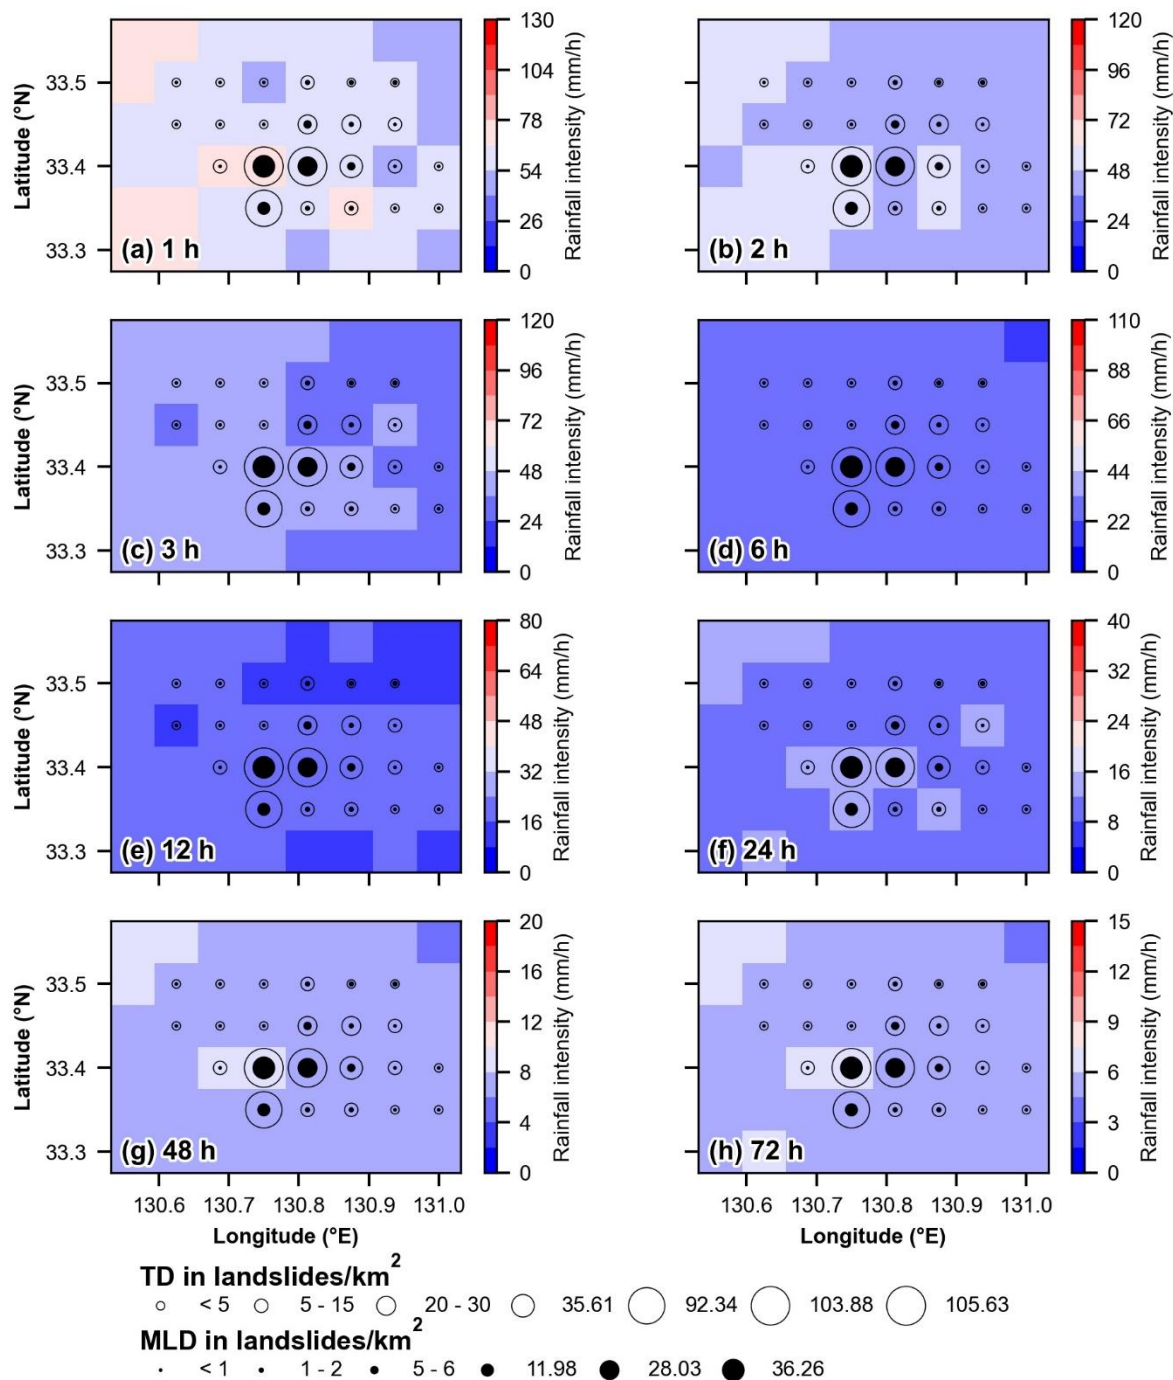

Figure S5: Estimated rainfall intensities for 5-year return period



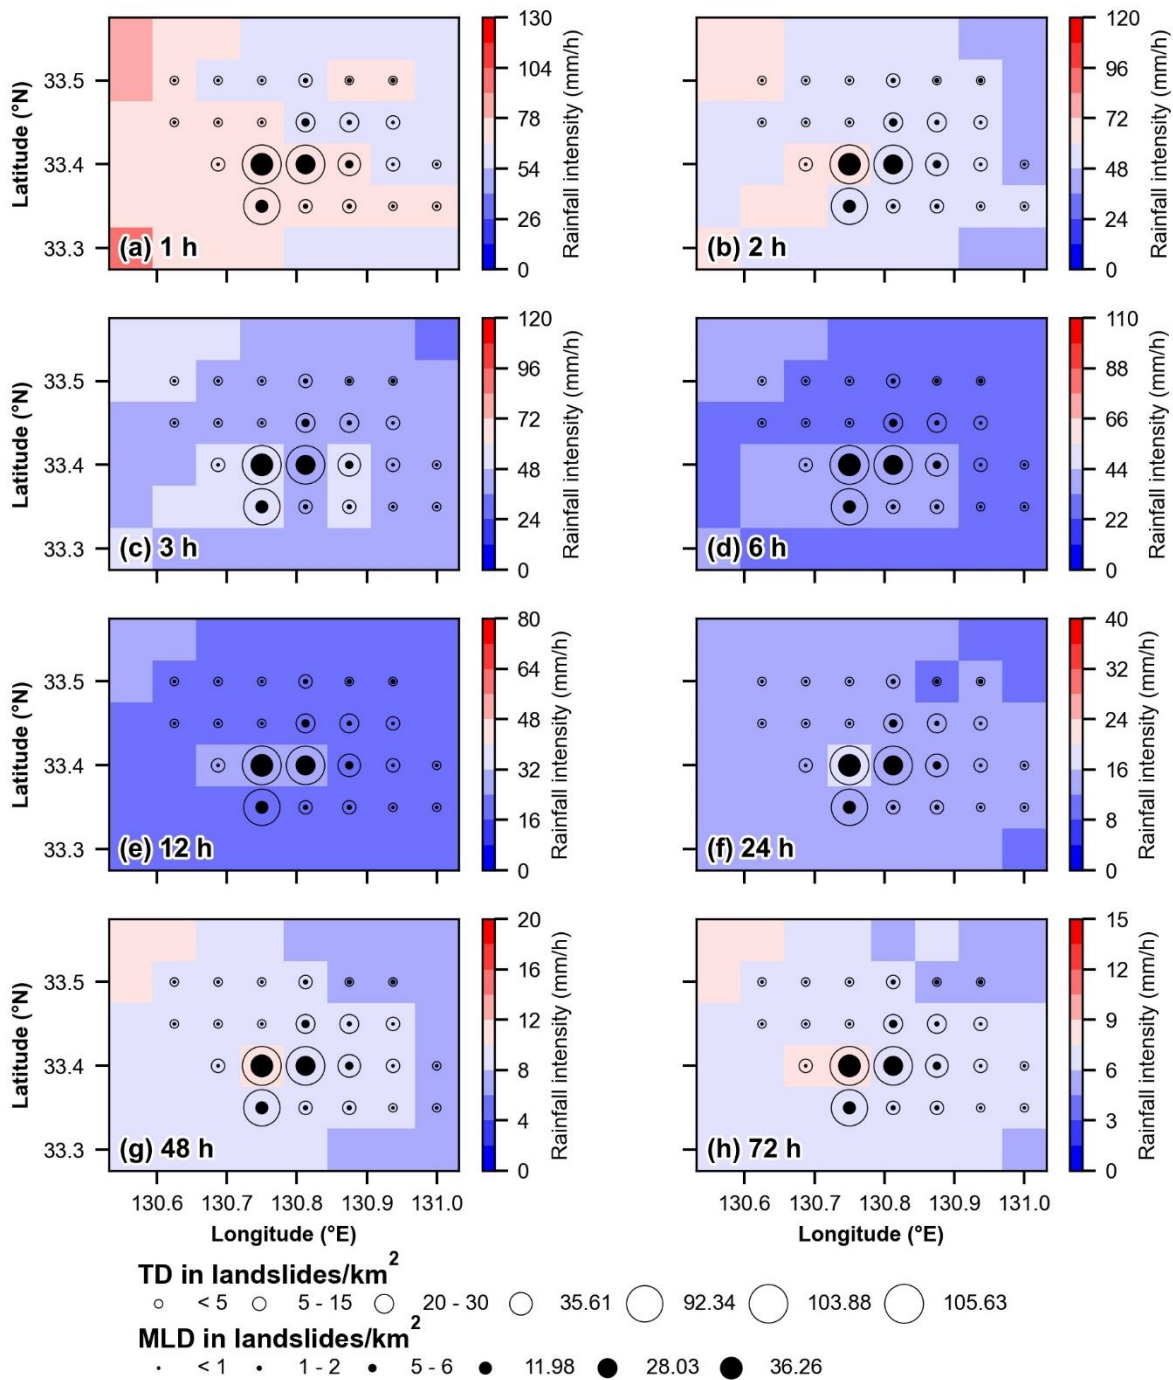

20

Figure S6: Estimated rainfall intensities for 10-year return period



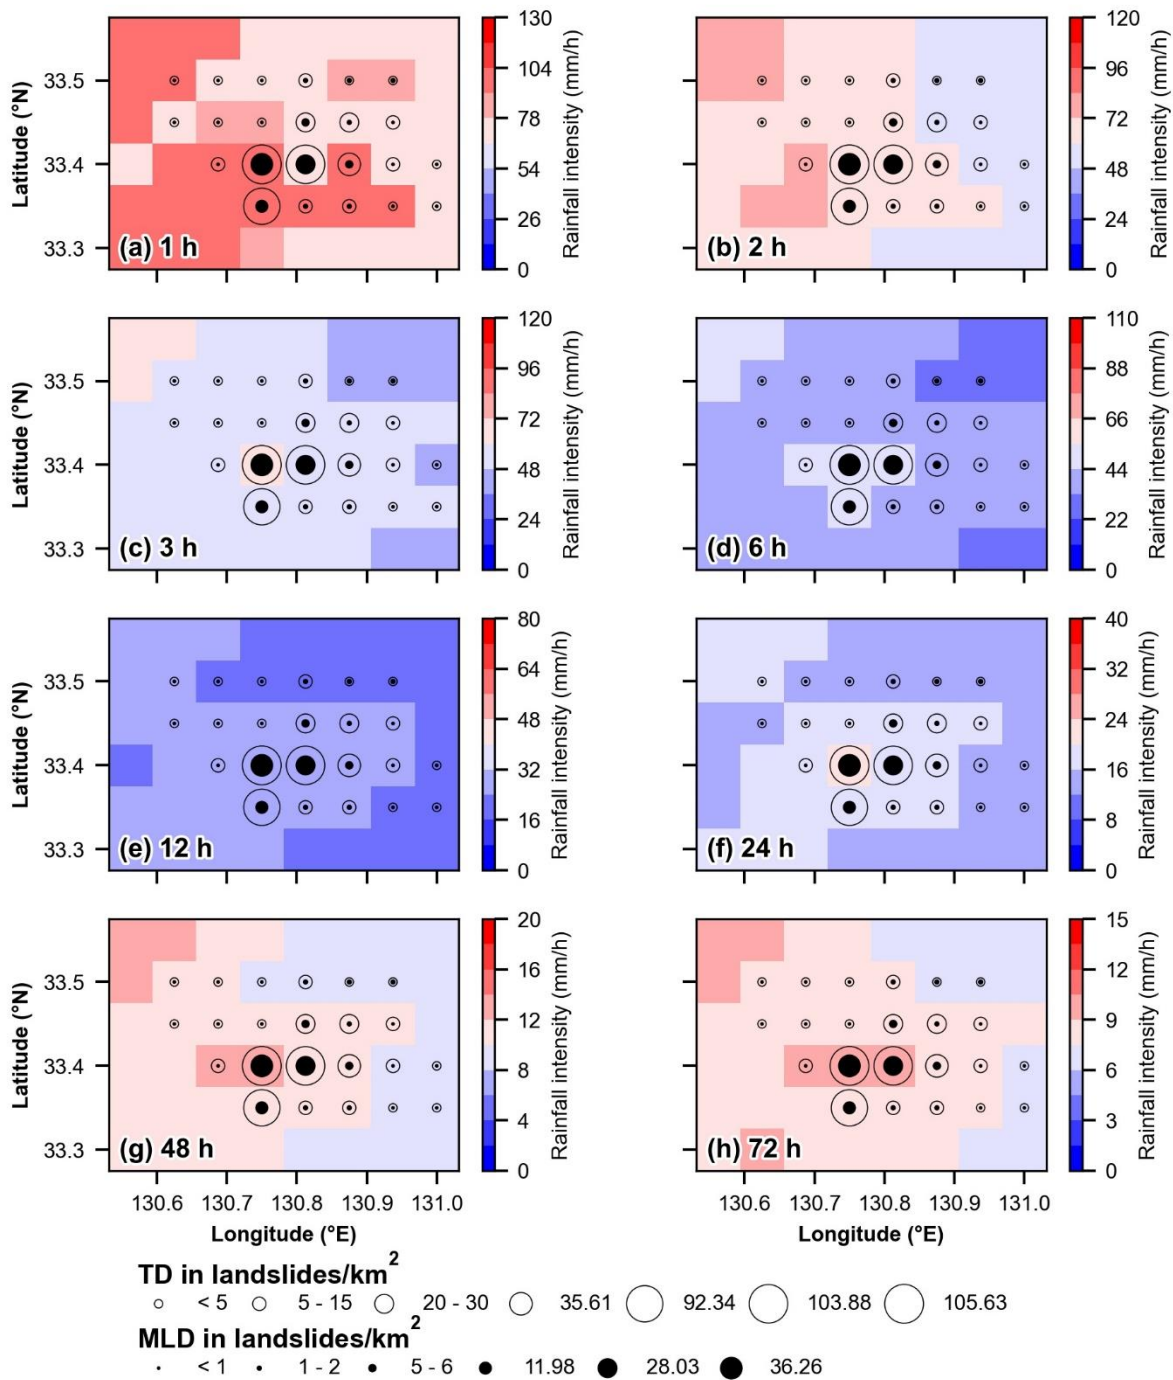

Figure S7: Estimated rainfall intensities for 25-year return period

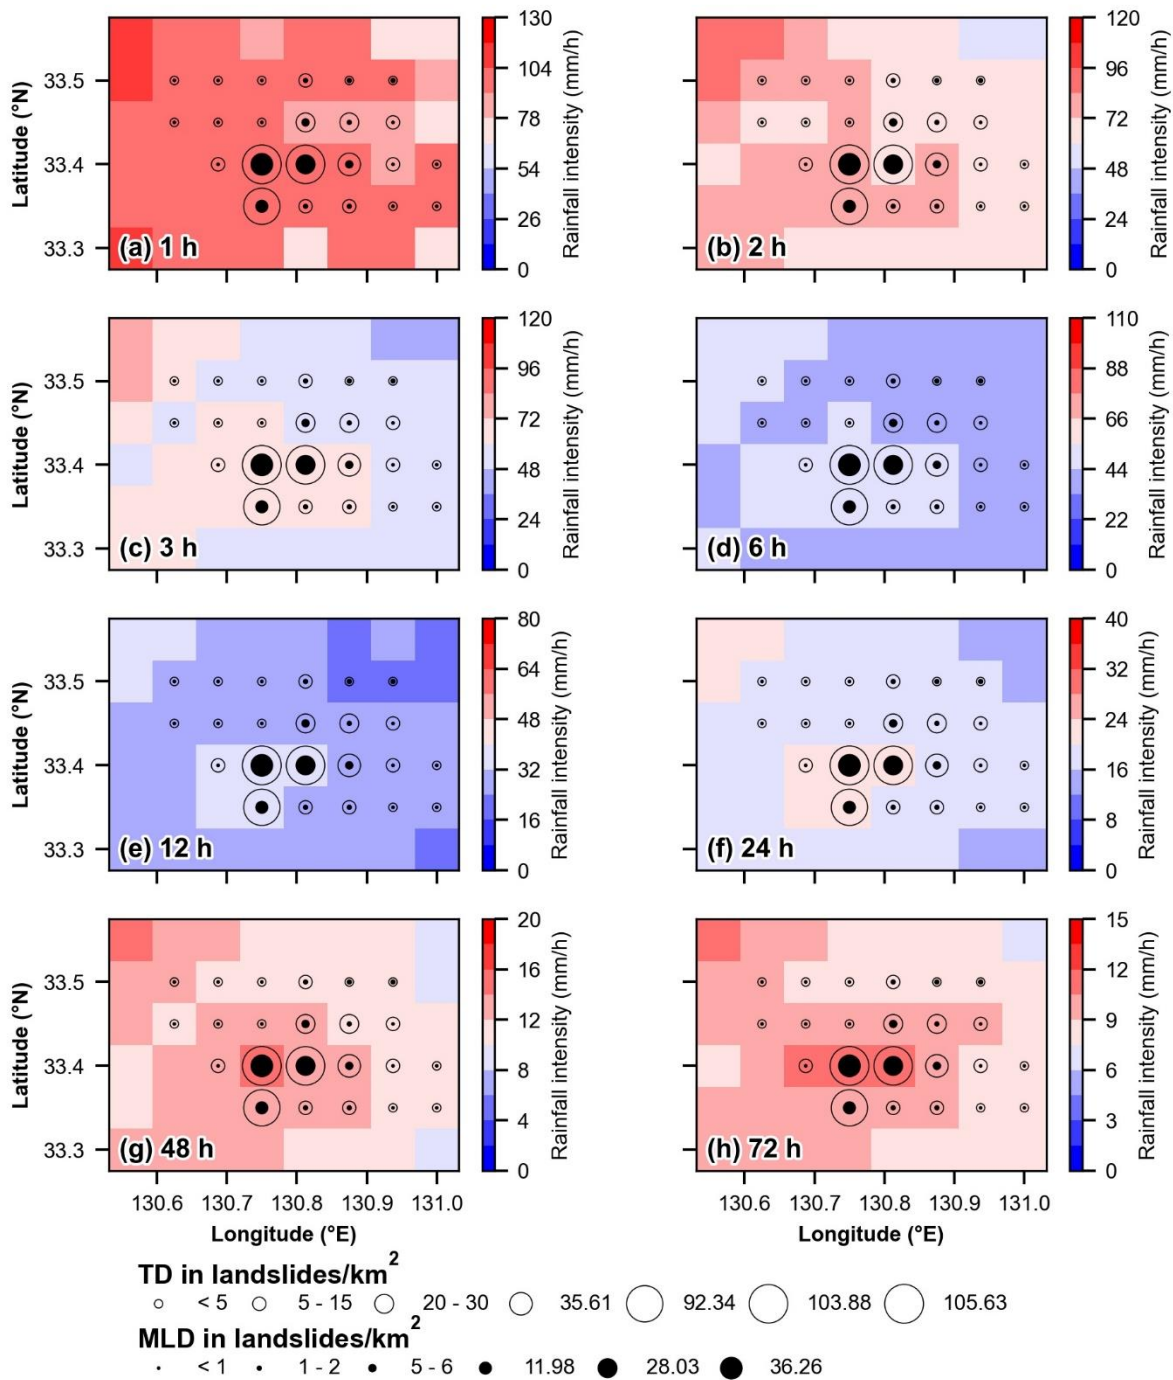

Figure S8: Estimated rainfall intensities for 50-year return period

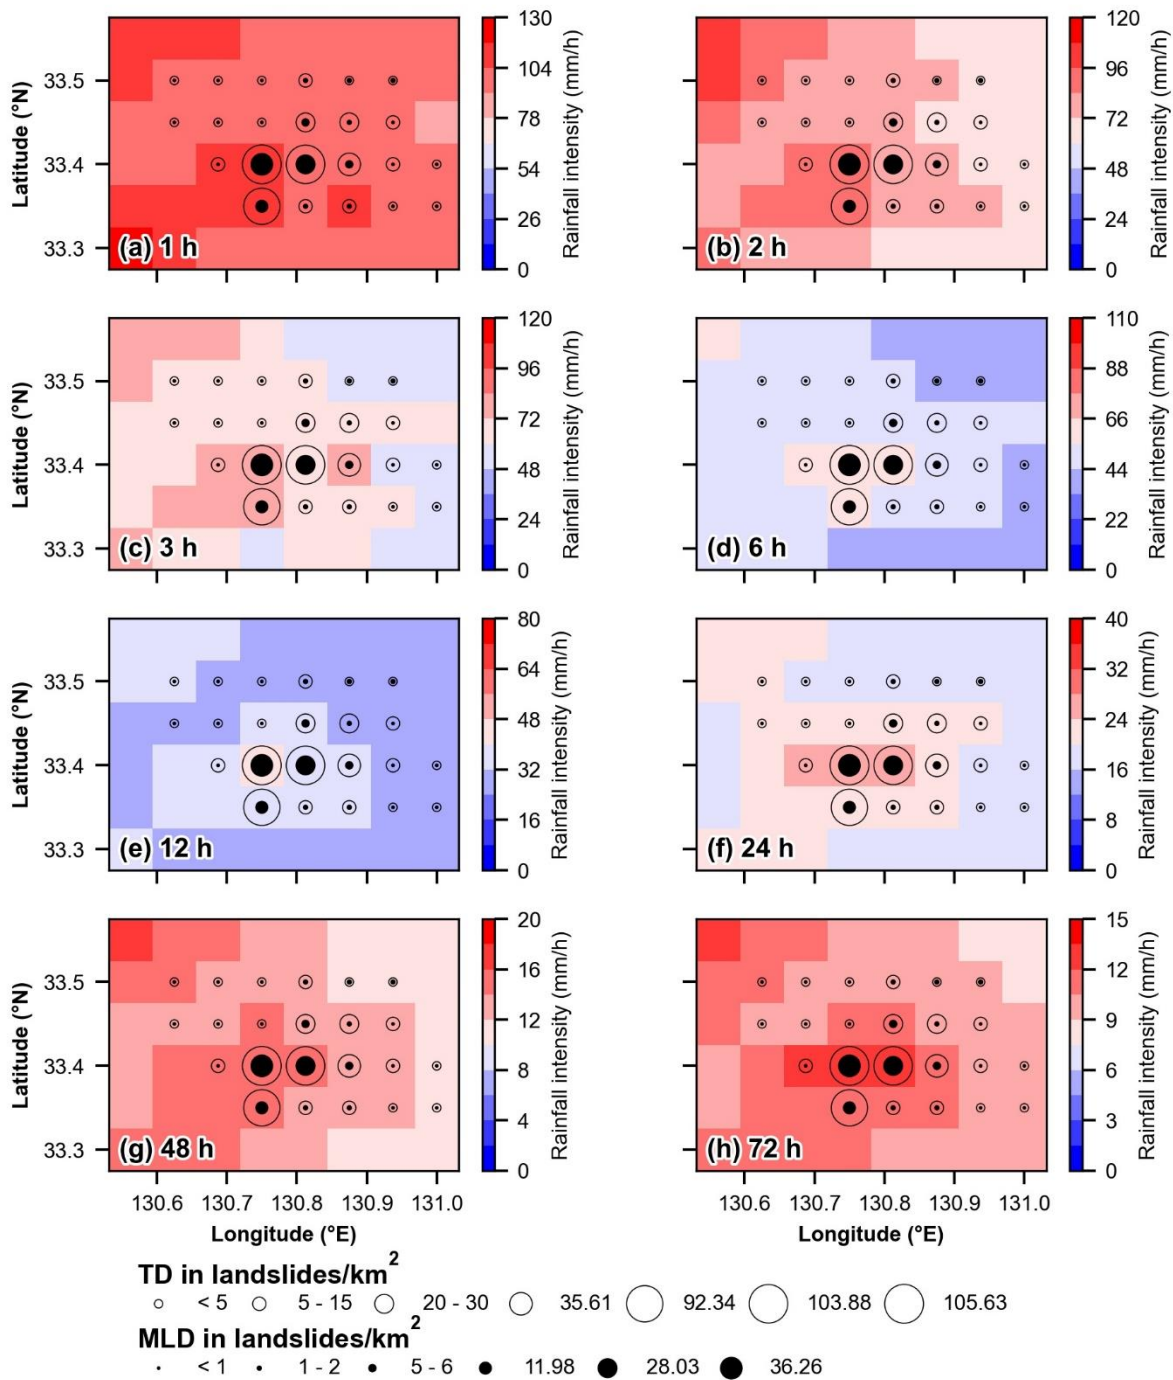

Figure S9: Estimated rainfall intensities for 100-year return period

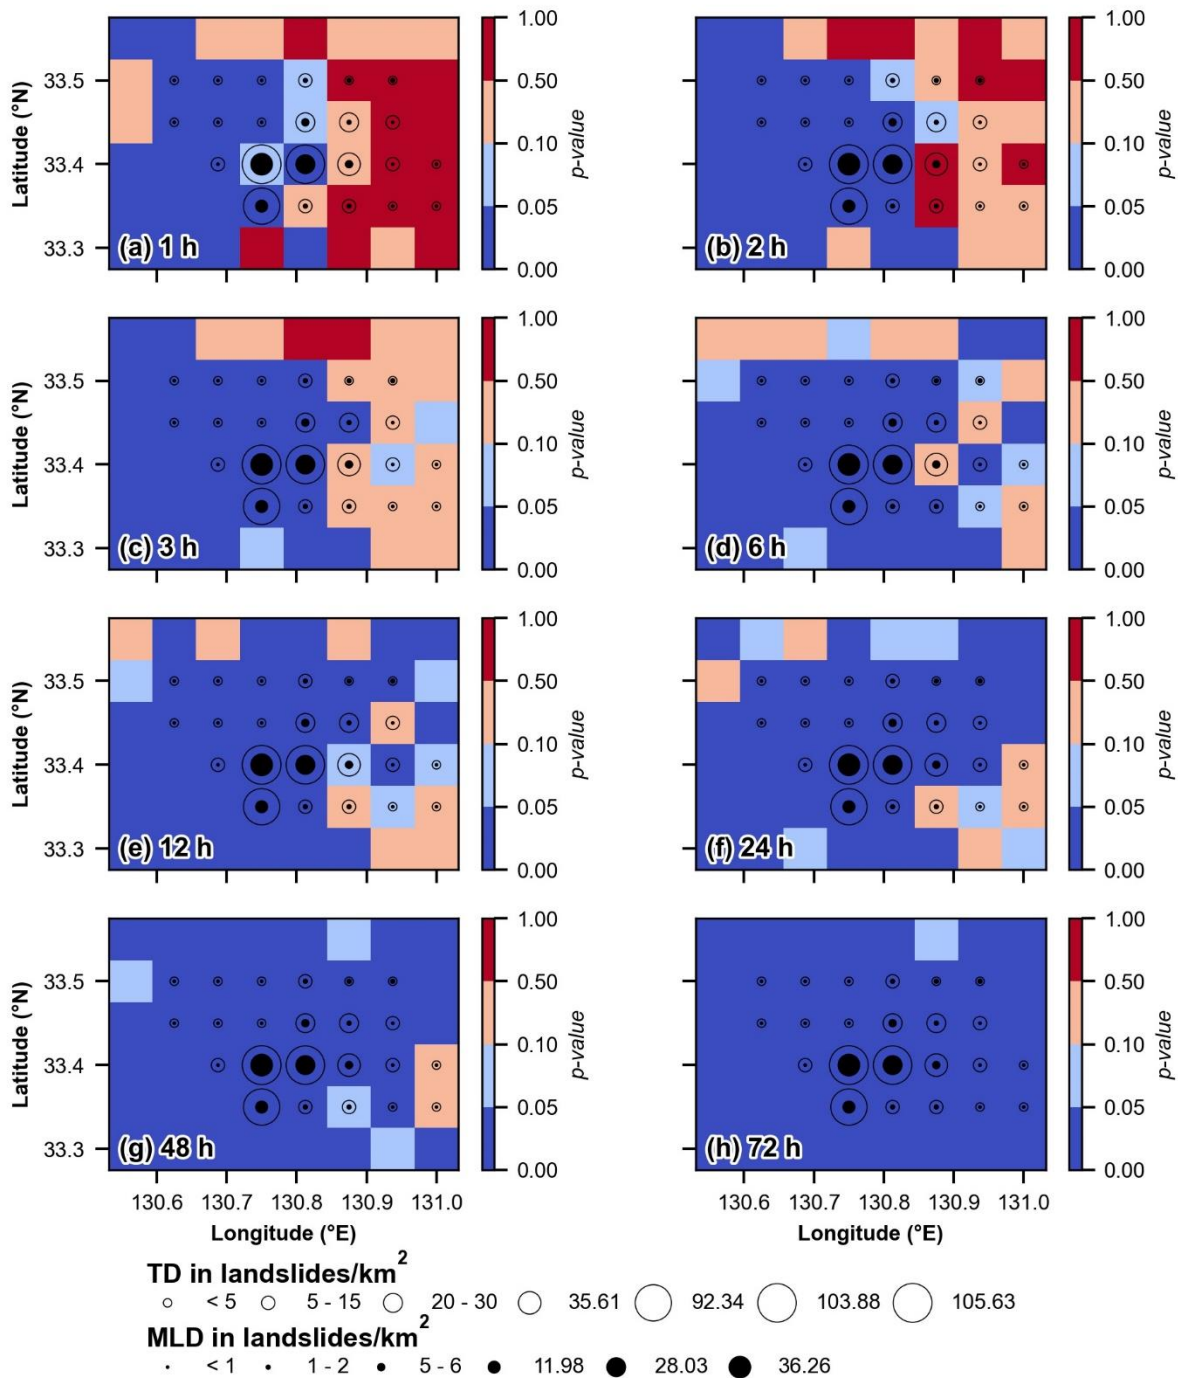

Figure S10: Spatial distribution maps of *p-values* resulted from the Mann-Kendall test



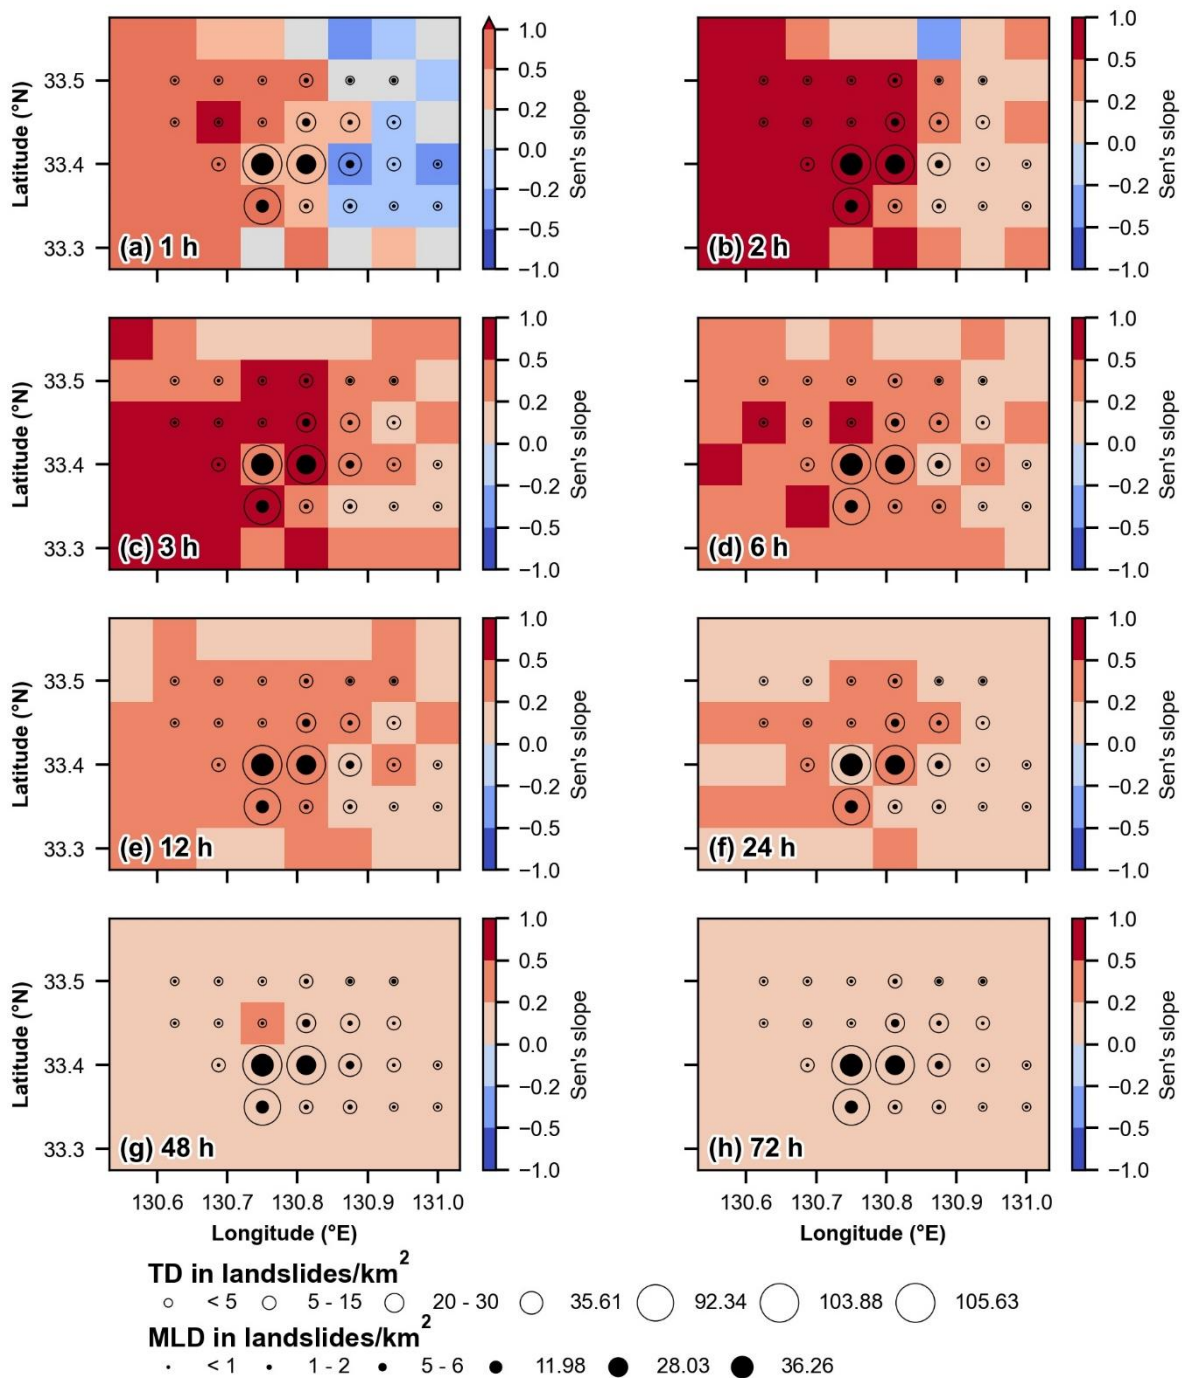

35 Figure S11: Spatial distribution maps of Sen's slope

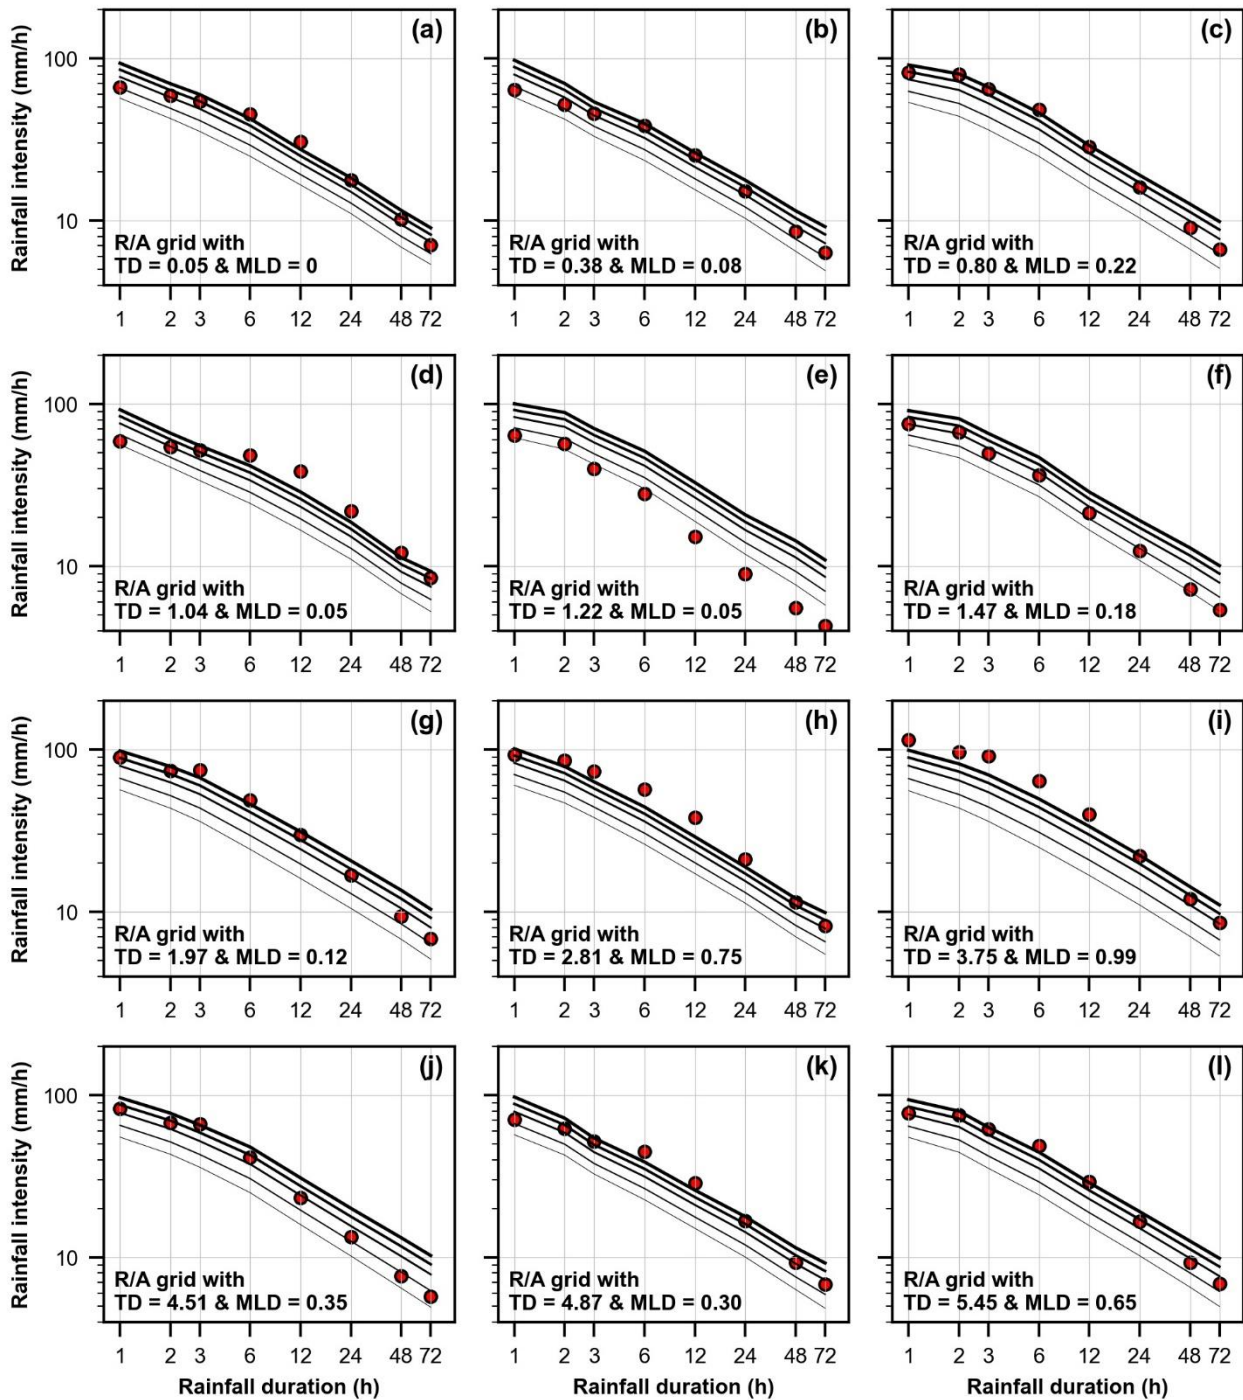

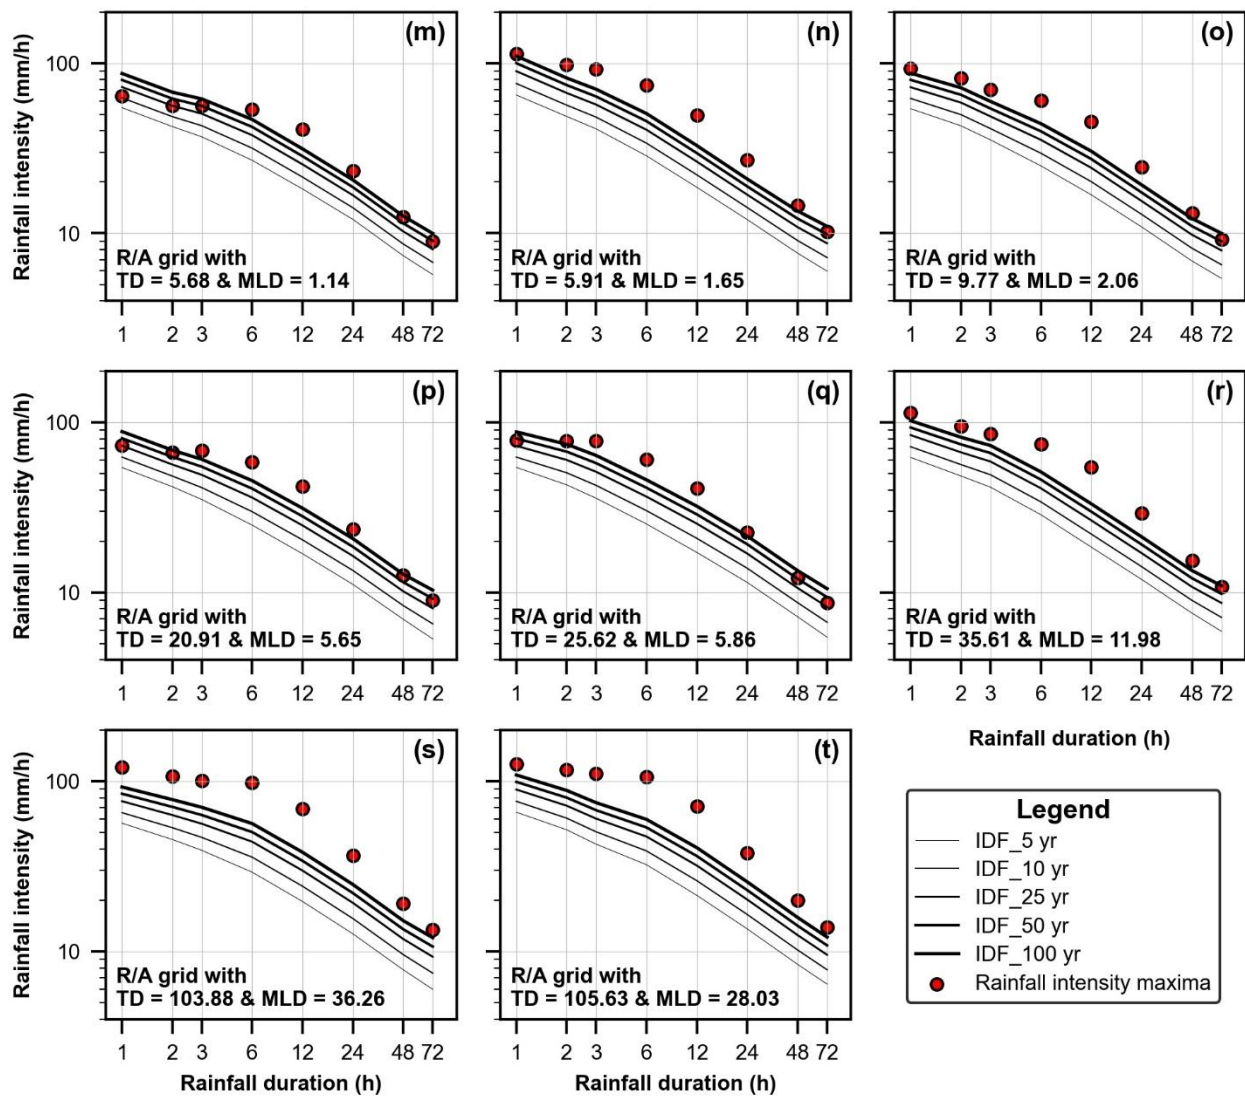

40 Figure S12: IDF curves and rainfall intensity maxima for multiple timespans (1 – 72 h) within the  $P_{std}$  for the different R/A grid cells (excluding three R/A grid cells where landslide occurrence was deemed to be affected by anthropogenic activities).



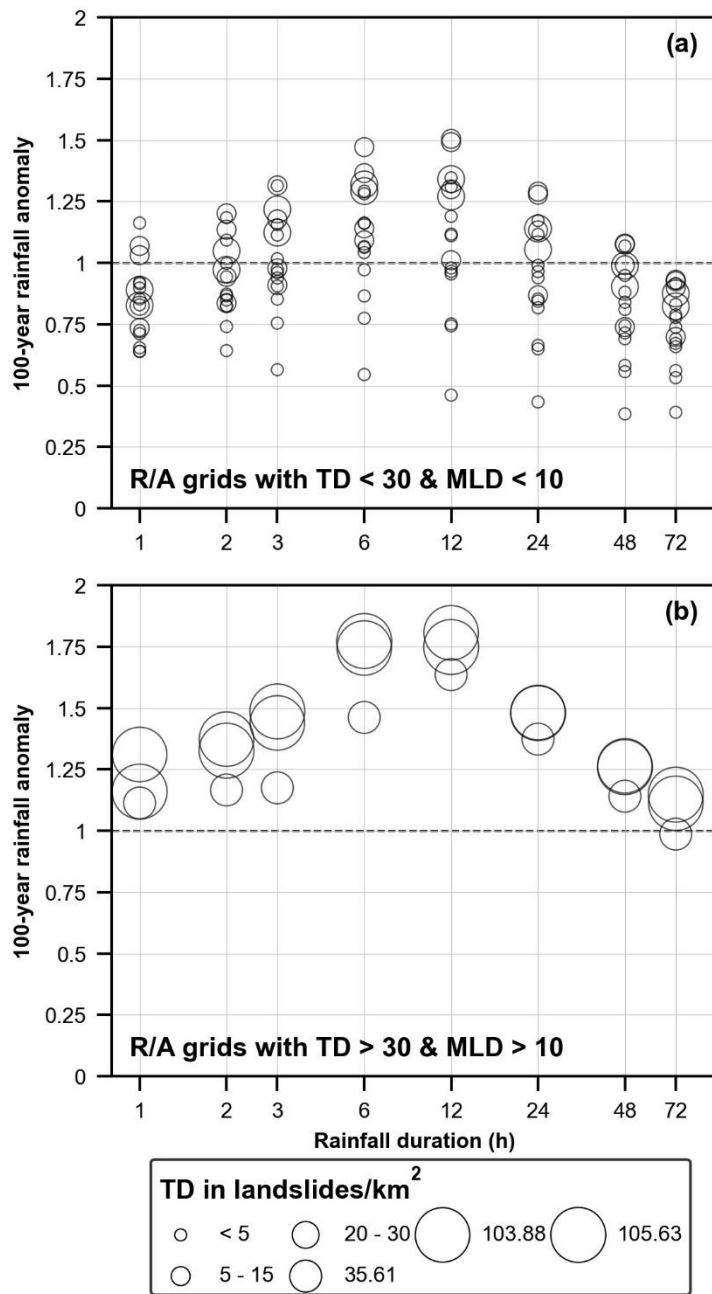

Figure S13: Variation of the 100-year rainfall anomaly at multiple timespans over the R/A grid cells with low (a) and high landslide density (b) (excluding three R/A grid cells where landslide occurrence was deemed to be affected by anthropogenic activities).

**Table S1. Adjusted  $p$ -values from multiple pairwise comparisons of slope distributions within  $A_{threshold}$  using the Dunn's test. The analysis expected three R/A grid cells, where most landslides occurred in areas affected by anthropogenic activities (e.g., slopes surrounding cropland and paddy field). The null hypothesis assumes no significant differences in slope distributions. A  $p$ -value higher than a significant level of 5 % leads to accept the null hypothesis. The test was applied after rejecting the null hypothesis of the Kruskal-Wallis static, which indicated significant differences in slope distributions within  $A_{threshold}$  of the R/A grid cells.**

| <b>TD</b>     | <b>0.05</b> | <b>0.38</b> | <b>0.8</b> | <b>1.04</b> | <b>1.22</b> | <b>4.51</b> | <b>2.81</b> | <b>1.47</b> | <b>1.97</b> | <b>3.75</b> | <b>4.87</b> | <b>5.91</b> | <b>5.45</b> | <b>5.68</b> | <b>9.77</b> | <b>20.91</b> | <b>25.26</b> | <b>35.61</b> | <b>105.63</b> | <b>103.88</b> |      |
|---------------|-------------|-------------|------------|-------------|-------------|-------------|-------------|-------------|-------------|-------------|-------------|-------------|-------------|-------------|-------------|--------------|--------------|--------------|---------------|---------------|------|
| <b>0.05</b>   | 1.00        |             |            |             |             |             |             |             |             |             |             |             |             |             |             |              |              |              |               |               |      |
| <b>0.38</b>   | 0.00        | 1.00        |            |             |             |             |             |             |             |             |             |             |             |             |             |              |              |              |               |               |      |
| <b>0.8</b>    | 0.00        | 1.00        | 1.00       |             |             |             |             |             |             |             |             |             |             |             |             |              |              |              |               |               |      |
| <b>1.04</b>   | 1.00        | 0.00        | 0.00       | 1.00        |             |             |             |             |             |             |             |             |             |             |             |              |              |              |               |               |      |
| <b>1.22</b>   | 0.00        | 0.00        | 0.00       | 0.00        | 1.00        |             |             |             |             |             |             |             |             |             |             |              |              |              |               |               |      |
| <b>4.51</b>   | 0.00        | 0.00        | 0.00       | 0.00        | 0.00        | 1.00        |             |             |             |             |             |             |             |             |             |              |              |              |               |               |      |
| <b>2.81</b>   | 0.00        | 0.00        | 0.00       | 0.00        | 0.00        | 0.00        | 1.00        |             |             |             |             |             |             |             |             |              |              |              |               |               |      |
| <b>1.47</b>   | 0.00        | 0.00        | 0.00       | 0.00        | 0.00        | 0.00        | 0.00        | 1.00        |             |             |             |             |             |             |             |              |              |              |               |               |      |
| <b>1.97</b>   | 0.00        | 0.00        | 0.00       | 0.00        | 0.00        | 0.00        | 0.00        | 0.00        | 1.00        |             |             |             |             |             |             |              |              |              |               |               |      |
| <b>3.75</b>   | 0.00        | 0.00        | 0.00       | 0.00        | 0.00        | 0.00        | 0.00        | 0.00        | 0.00        | 1.00        |             |             |             |             |             |              |              |              |               |               |      |
| <b>4.87</b>   | 0.00        | 0.00        | 0.00       | 0.00        | 0.00        | 0.00        | 0.00        | 0.00        | 0.00        | 0.00        | 1.00        |             |             |             |             |              |              |              |               |               |      |
| <b>5.91</b>   | 0.00        | 0.00        | 0.00       | 0.00        | 0.00        | 0.00        | 0.00        | 0.00        | 0.00        | 0.00        | 0.00        | 1.00        |             |             |             |              |              |              |               |               |      |
| <b>5.45</b>   | 0.00        | 0.01        | 0.08       | 0.00        | 0.00        | 0.00        | 0.00        | 0.00        | 0.00        | 0.00        | 0.00        | 0.00        | 1.00        |             |             |              |              |              |               |               |      |
| <b>5.68</b>   | 0.00        | 0.00        | 0.00       | 0.00        | 0.00        | 0.00        | 0.00        | 0.00        | 0.00        | 0.00        | 0.00        | 0.00        | 0.00        | 1.00        |             |              |              |              |               |               |      |
| <b>9.77</b>   | 0.00        | 0.00        | 0.00       | 0.00        | 0.00        | 0.00        | 0.00        | 0.00        | 0.00        | 0.00        | 0.00        | 0.00        | 0.00        | 0.00        | 1.00        |              |              |              |               |               |      |
| <b>20.91</b>  | 0.00        | 0.00        | 0.00       | 0.00        | 0.00        | 0.00        | 0.00        | 0.00        | 0.00        | 0.00        | 0.00        | 0.00        | 0.00        | 0.00        | 1.00        | 0.00         | 1.00         |              |               |               |      |
| <b>25.26</b>  | 0.00        | 0.00        | 0.00       | 0.00        | 0.00        | 0.00        | 0.00        | 0.00        | 0.00        | 0.00        | 0.00        | 0.00        | 0.00        | 0.00        | 0.00        | 0.00         | 0.00         | 1.00         |               |               |      |
| <b>35.61</b>  | 1.00        | 0.00        | 0.00       | 0.01        | 0.00        | 0.00        | 0.00        | 0.00        | 0.00        | 0.00        | 0.00        | 0.00        | 0.00        | 0.00        | 0.00        | 0.00         | 0.00         | 0.00         | 1.00          |               |      |
| <b>105.63</b> | 0.00        | 0.00        | 0.00       | 0.00        | 0.00        | 0.00        | 0.00        | 1.00        | 0.00        | 0.00        | 0.00        | 0.00        | 0.00        | 0.00        | 0.00        | 0.00         | 0.00         | 0.00         | 0.00          | 1.00          |      |
| <b>103.88</b> | 0.00        | 0.00        | 0.00       | 0.01        | 0.00        | 0.00        | 0.00        | 0.00        | 0.00        | 0.00        | 0.00        | 0.00        | 0.00        | 0.00        | 0.00        | 0.00         | 0.00         | 0.00         | 0.00          | 0.00          | 1.00 |

**Table S2: Spearman rank correlations between rainfall intensity maxima**

| <b>Duration (h)</b> | <b>1</b> | <b>2</b> | <b>3</b> | <b>6</b> | <b>12</b> | <b>24</b> | <b>48</b> | <b>72</b> |
|---------------------|----------|----------|----------|----------|-----------|-----------|-----------|-----------|
| <b>1</b>            | 1        |          |          |          |           |           |           |           |
| <b>2</b>            | 0.97     | 1        |          |          |           |           |           |           |
| <b>3</b>            | 0.93     | 0.93     | 1        |          |           |           |           |           |
| <b>6</b>            | 0.83     | 0.86     | 0.94     | 1        |           |           |           |           |
| <b>12</b>           | 0.71     | 0.74     | 0.85     | 0.96     | 1         |           |           |           |
| <b>24</b>           | 0.71     | 0.73     | 0.85     | 0.96     | 1         | 1         |           |           |
| <b>48</b>           | 0.70     | 0.72     | 0.84     | 0.95     | 1         | 1         | 1         |           |
| <b>72</b>           | 0.71     | 0.74     | 0.84     | 0.96     | 1         | 1         | 1         | 1         |
